# Supplementary material for: Sympathetic neuropeptide Y protects from obesity by sustaining thermogenic fat
Source: PubMed Central journal article supplement (PMC11446830; doi:10.1038/s41586-024-07863-6), 2024-08-28
Supplement: 41586_2024_7863_MOESM1_ESM.pdf [file 41586_2024_7863_MOESM1_ESM.pdf]

---

**Supplementary information**

---

**Sympathetic neuropeptide Y protects from obesity by sustaining thermogenic fat**

---

In the format provided by the authors and unedited

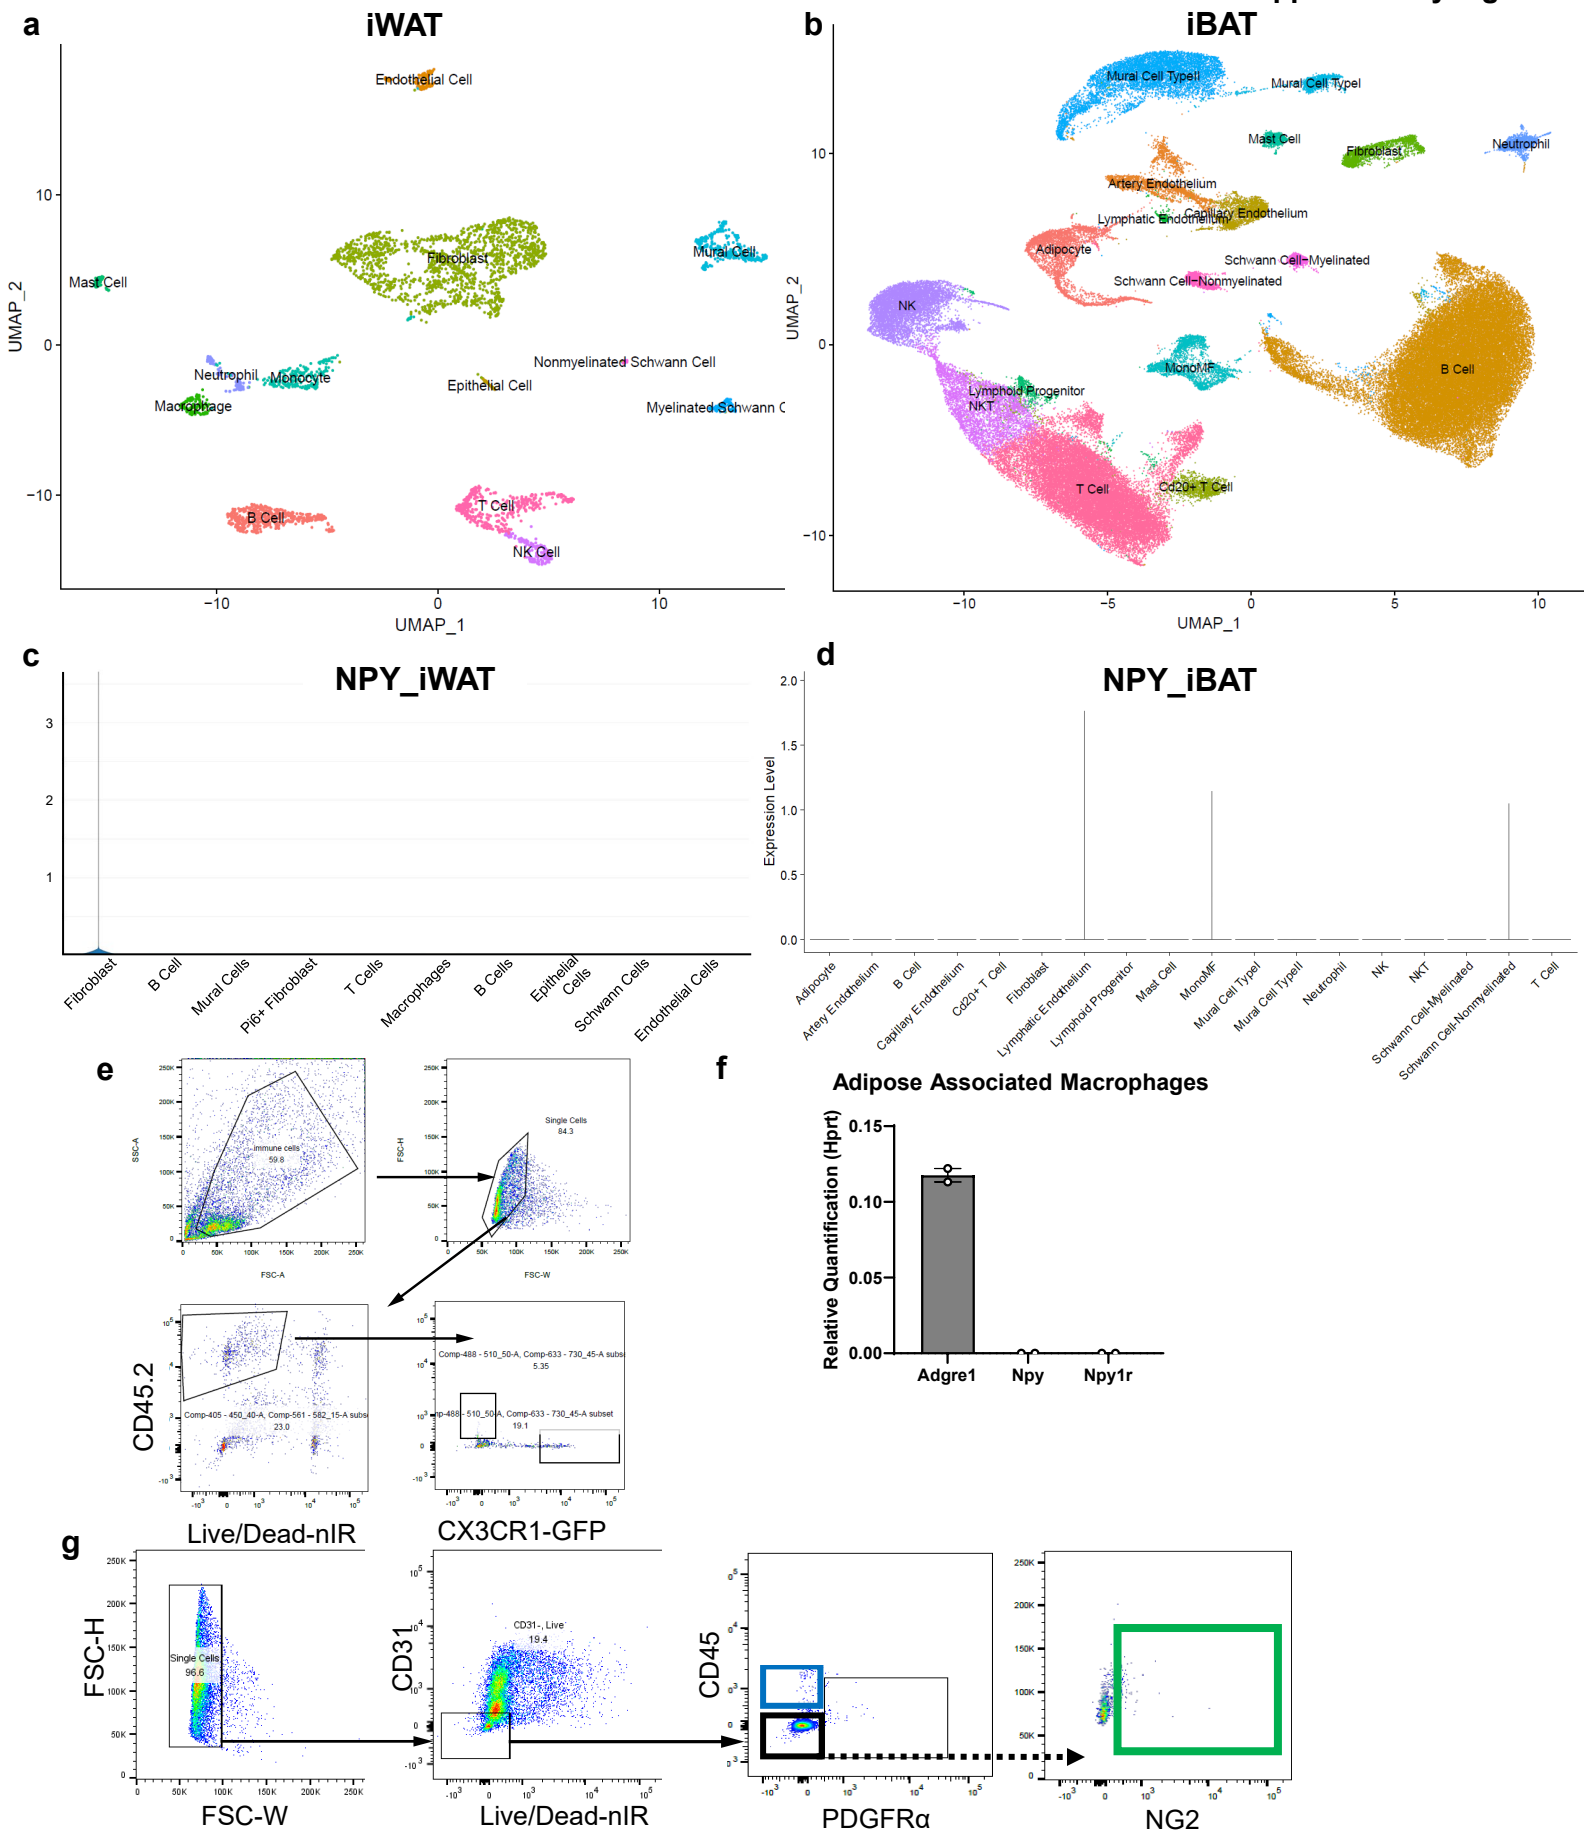

**Supplementary Figure 1. *Npy* is not expressed in adipose tissues, and NPY receptors are not expressed in macrophages.**

(a-b) Embedding plots showing different clusters of cells in the SVF of murine (a) iWAT<sup>1</sup> and (b) iBAT<sup>2</sup>. (c-d) Violin plot showing the expression of *Npy* in the SVF of murine (c) iWAT and (d) iBAT. (e) Gating strategy of sorting adipose associated macrophages (ATM) from *Cx3cr1*<sup>GFP/+</sup> reporter mice. ATMs were sorted as live/CD45.2<sup>+</sup>/GFP<sup>+</sup> cells. (f) The expression of *Adgre1* (F4/80), *Npy*, and *Npy1r* in adipose associated macrophages (ATM) (n=2). (g) Gating strategy for sorting mural cells from the SVF of the iWAT of wild type normal-diet treated mice, used for Figure 2e. Mural cells (green box) are sorted as live/CD31<sup>+</sup>/CD45<sup>+</sup>/PDGFR $\alpha$ <sup>+</sup>/NG2<sup>+</sup> cells; immune cells (blue box) are sorted as live, CD31<sup>+</sup>/CD45<sup>+</sup> cells. The same gating strategy was also used for cell cytometry data shown in Extended Data Fig. 8c-d. All values are expressed as mean  $\pm$  SEM.

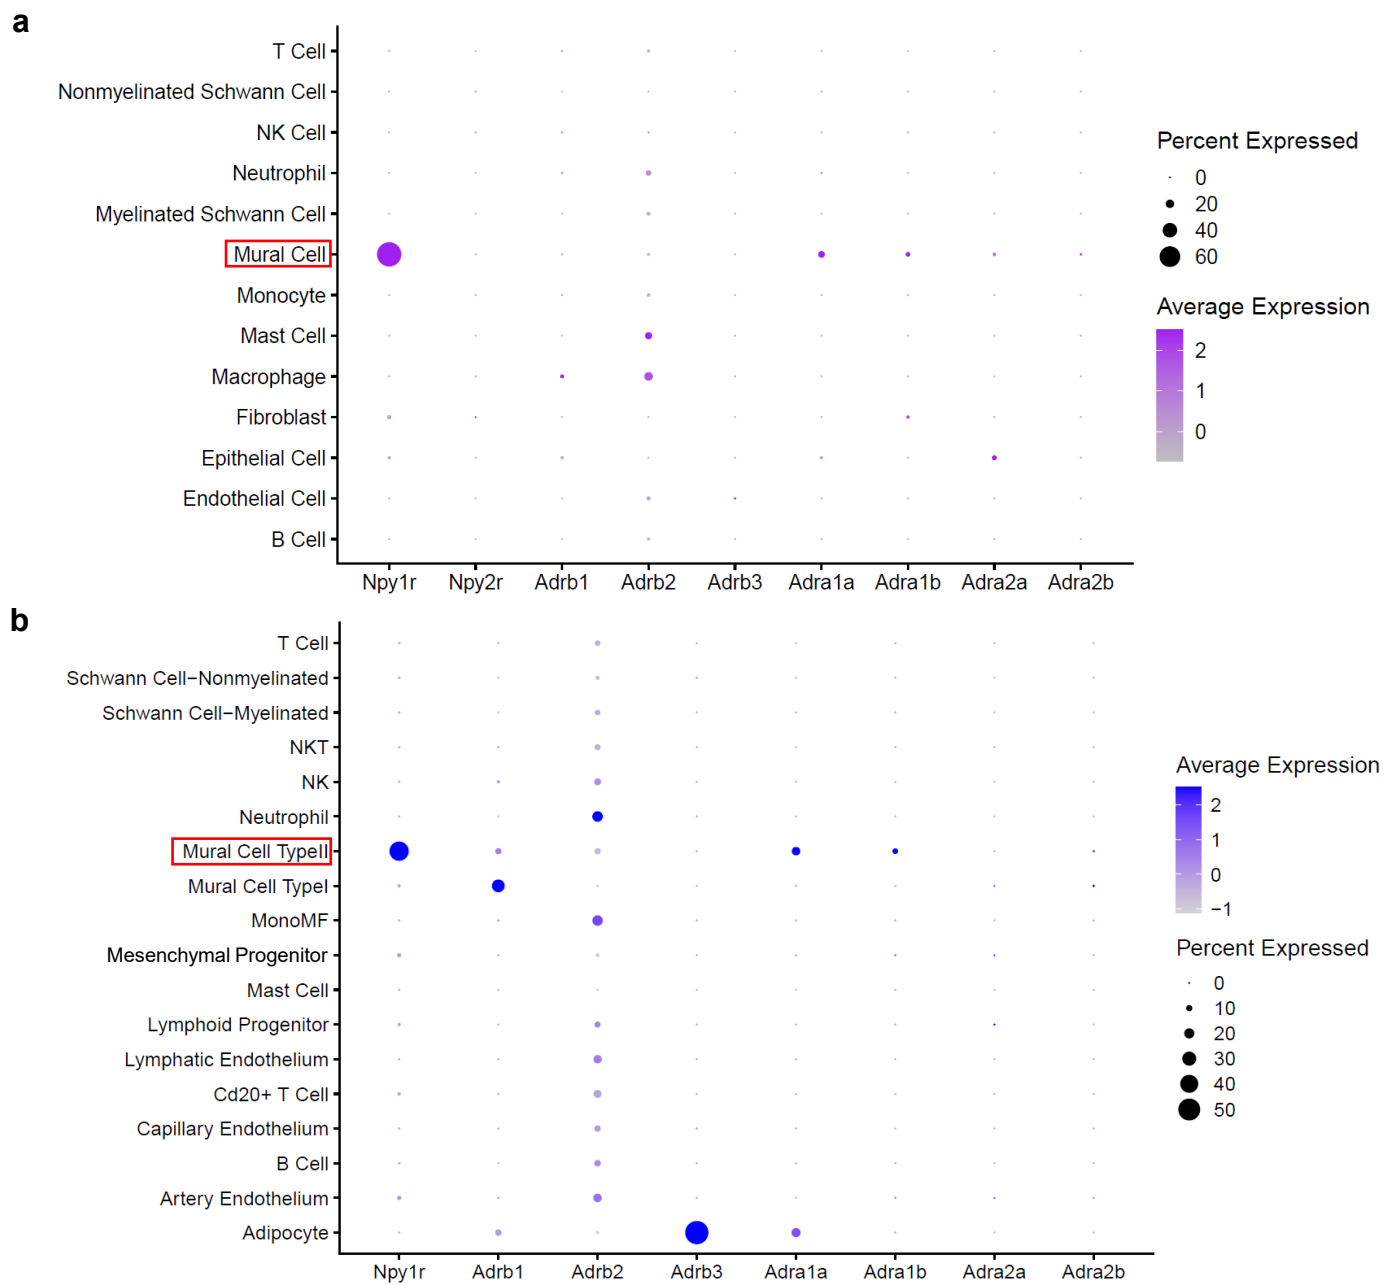

**Supplementary Figure 2. The expression levels of *Npy2r* and *Npy5r* in adipose tissues are negligible.**

**(a)** Dot plot showing the expression of *Npy1r*, *Npy2r*, *Adra1a*, *Adra1b*, *Adra2a*, *Adrb1*, *Adrb2*, and *Adrb3* in different cells in the SVF of mice iWAT. **(b)** Dot plot showing the expression of *Npy1r*, *Adrb1*, *Adrb2*, *Adrb3*, *Adra1a*, *Adra1b*, *Adra2a*, and *Adra2b* in different types of cells in mouse iBAT. The size of the dot represents the percentage of cells expressing a certain gene, and the darkness of the dot represents the expression level. Mural cell clusters are highlighted with red rectangles.

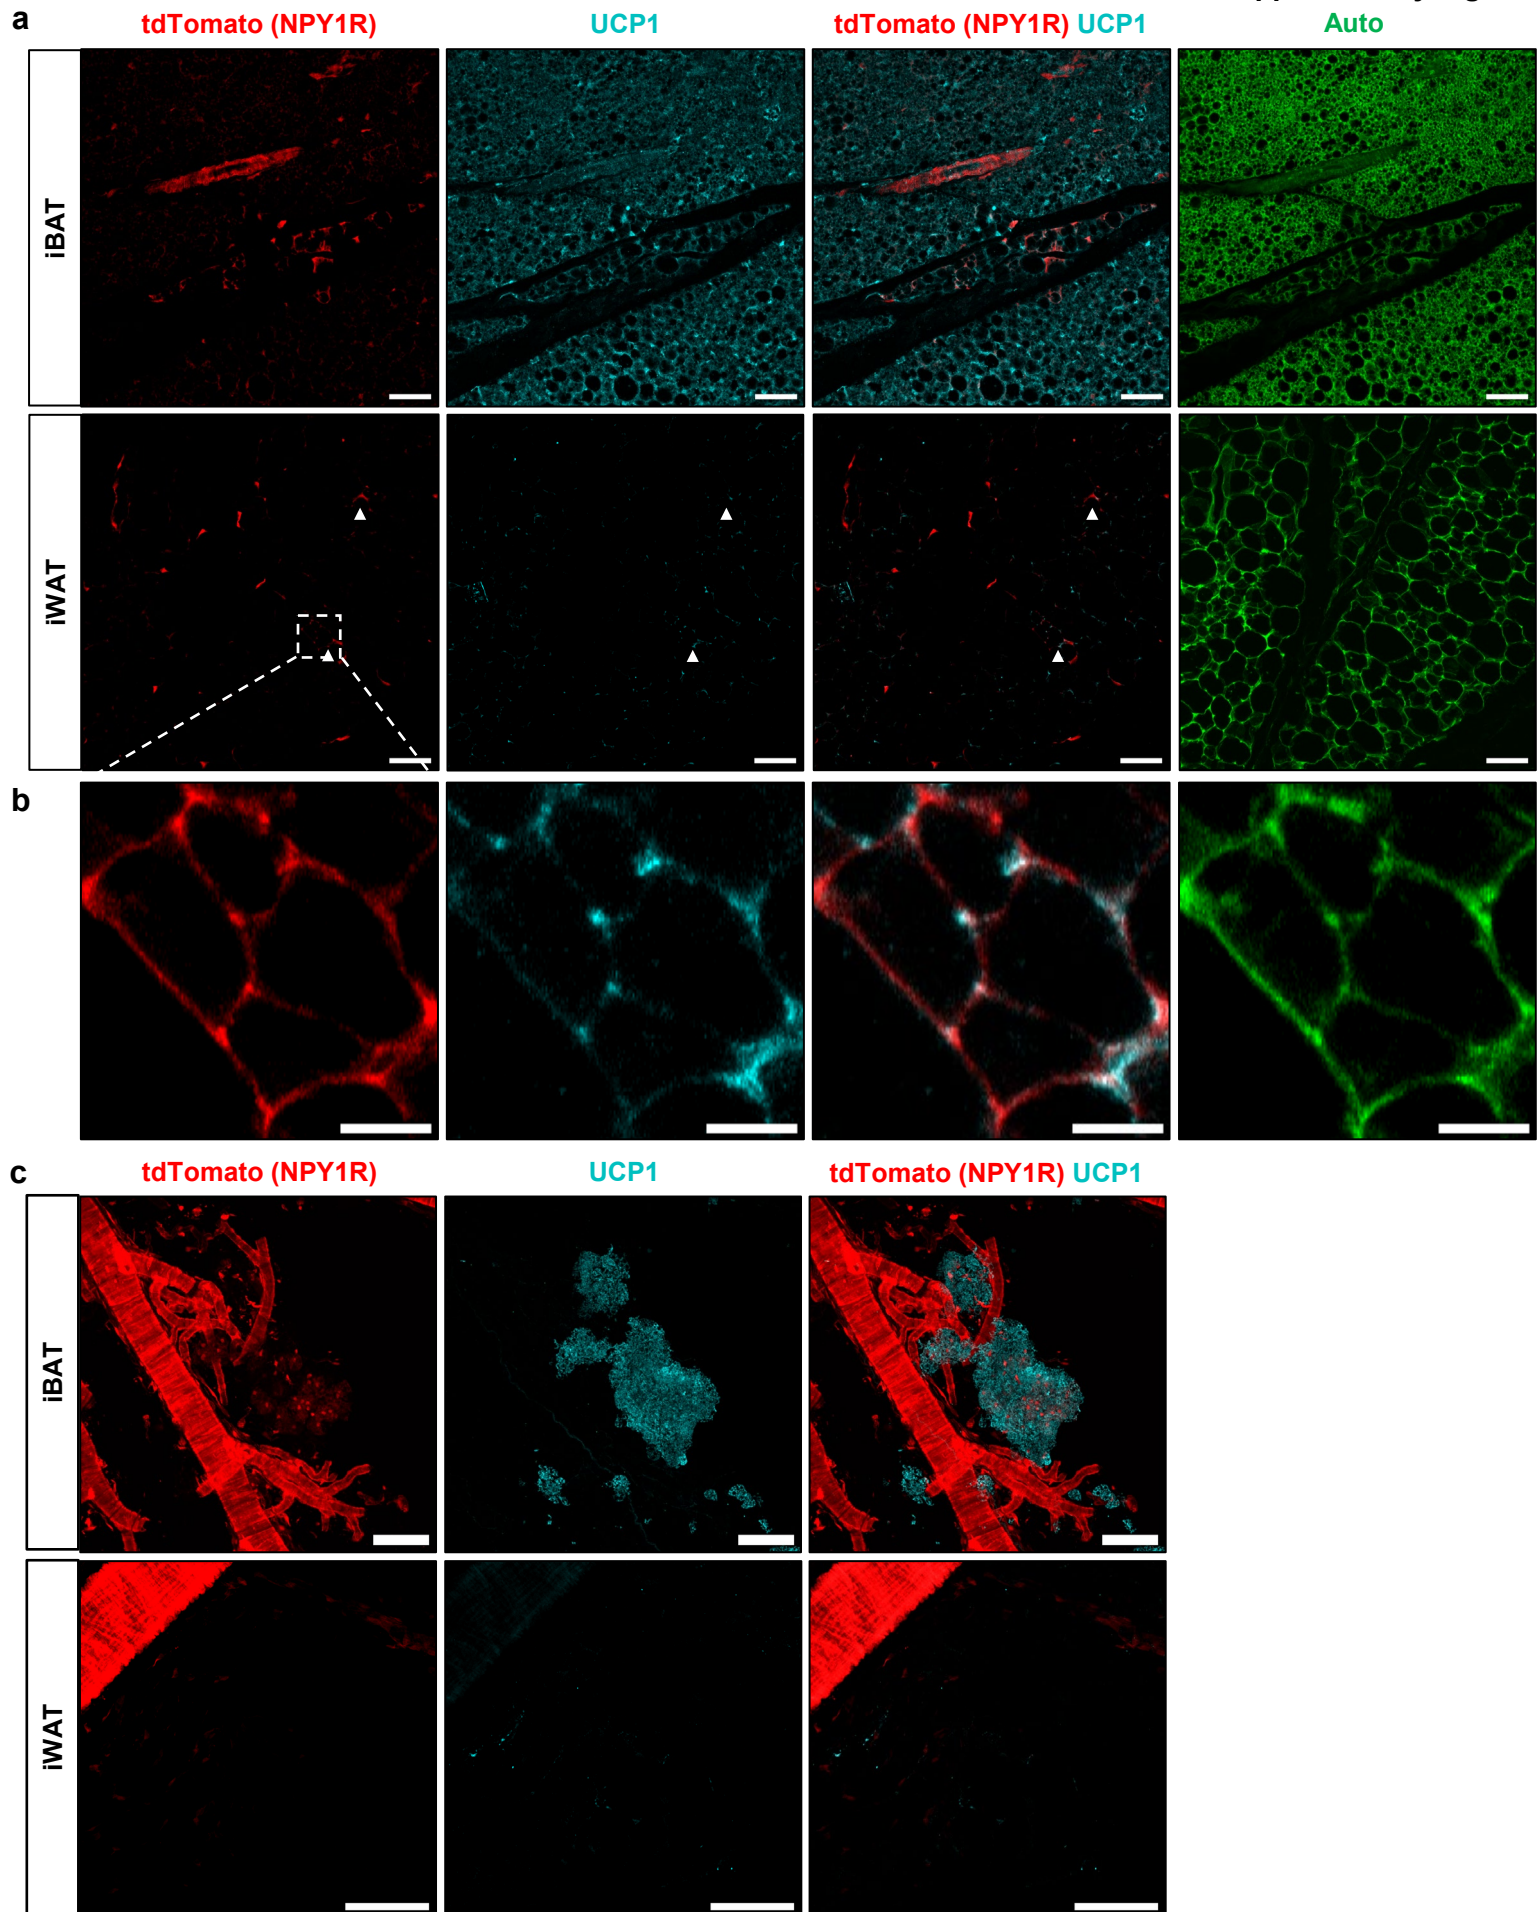

**Supplementary Figure 3. Only UCP1<sup>+</sup> multi-locular adipocytes are lineage-traced to NPY1R.**

(a-c) Confocal images of (a) paraffin-embedded slides (scale bar=50 $\mu$ m) and (c) whole-mount vessels (scale bar=100 $\mu$ m) of iBAT and iWAT of 12-week-old male *Npy1r<sup>Cre</sup>; Rosa26<sup>tdTomato</sup>* mice stained with UCP1 (Cyan). (b) is zoomed-in (a) (scale bar=10 $\mu$ m). 488nm laser-excited autofluorescence (green), which is deviated from red and far-red (cyan) channels, indicates the presence of adipocytes. White arrows indicate multi-locular UCP1<sup>+</sup> adipocytes in iWAT. Representative images are shown from 2 experiments.

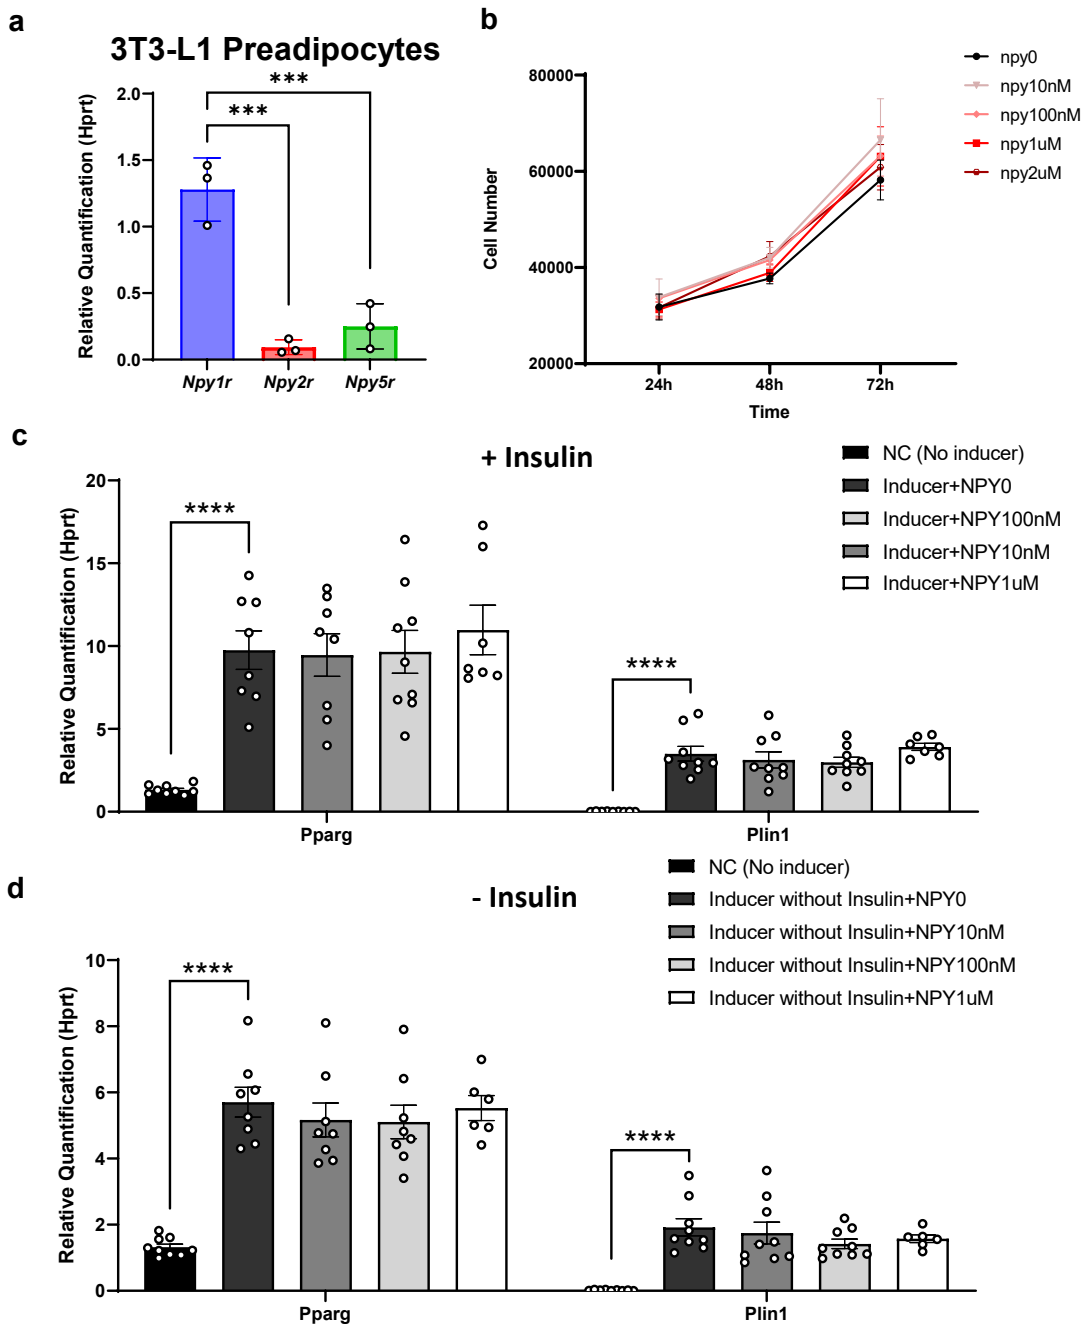

**Supplementary Supplementary Figure 4. NPY does not affect proliferation or adipogenesis of 3T3-L1.**

(a) The expression of *Npy1r*, *Npy2r*, and *Npy5r* in 3T3-L1 preadipocyte cell line (n=3 biologically independent samples). *Npy1r* vs. *Npy2r*,  $P=0.0004$ ; *Npy1r* vs. *Npy5r*,  $P=0.0008$ . (b) The impact of NPY on the proliferation of 3T3-L1 preadipocytes revealed by the cell number after incubating with or without 1  $\mu$ M NPY for 24, 48, and 72 hours (n=3 biologically independent samples). (c-d) The expression of adipogenesis markers *Pparg* and *Plin1* in differentiated 3T3-L1 preadipocytes induced by induction medium (c) with or (d) without 1  $\mu$ g/mL insulin (n=9, 8, 8, 9 & 7 biologically independent samples per for *Pparg*, n=9, 9, 9, 9 & 7 biologically independent samples per for *Plin1*). The concentration of NPY is indicated in the plot. For all comparisons labelled,  $P<0.0001$ . All values are expressed as mean  $\pm$  SEM. Statistical comparisons were made using one-way ANOVA, \* $p<0.05$ , \*\* $p<0.01$ , \*\*\* $p<0.001$ , \*\*\*\* $p<0.0001$ .

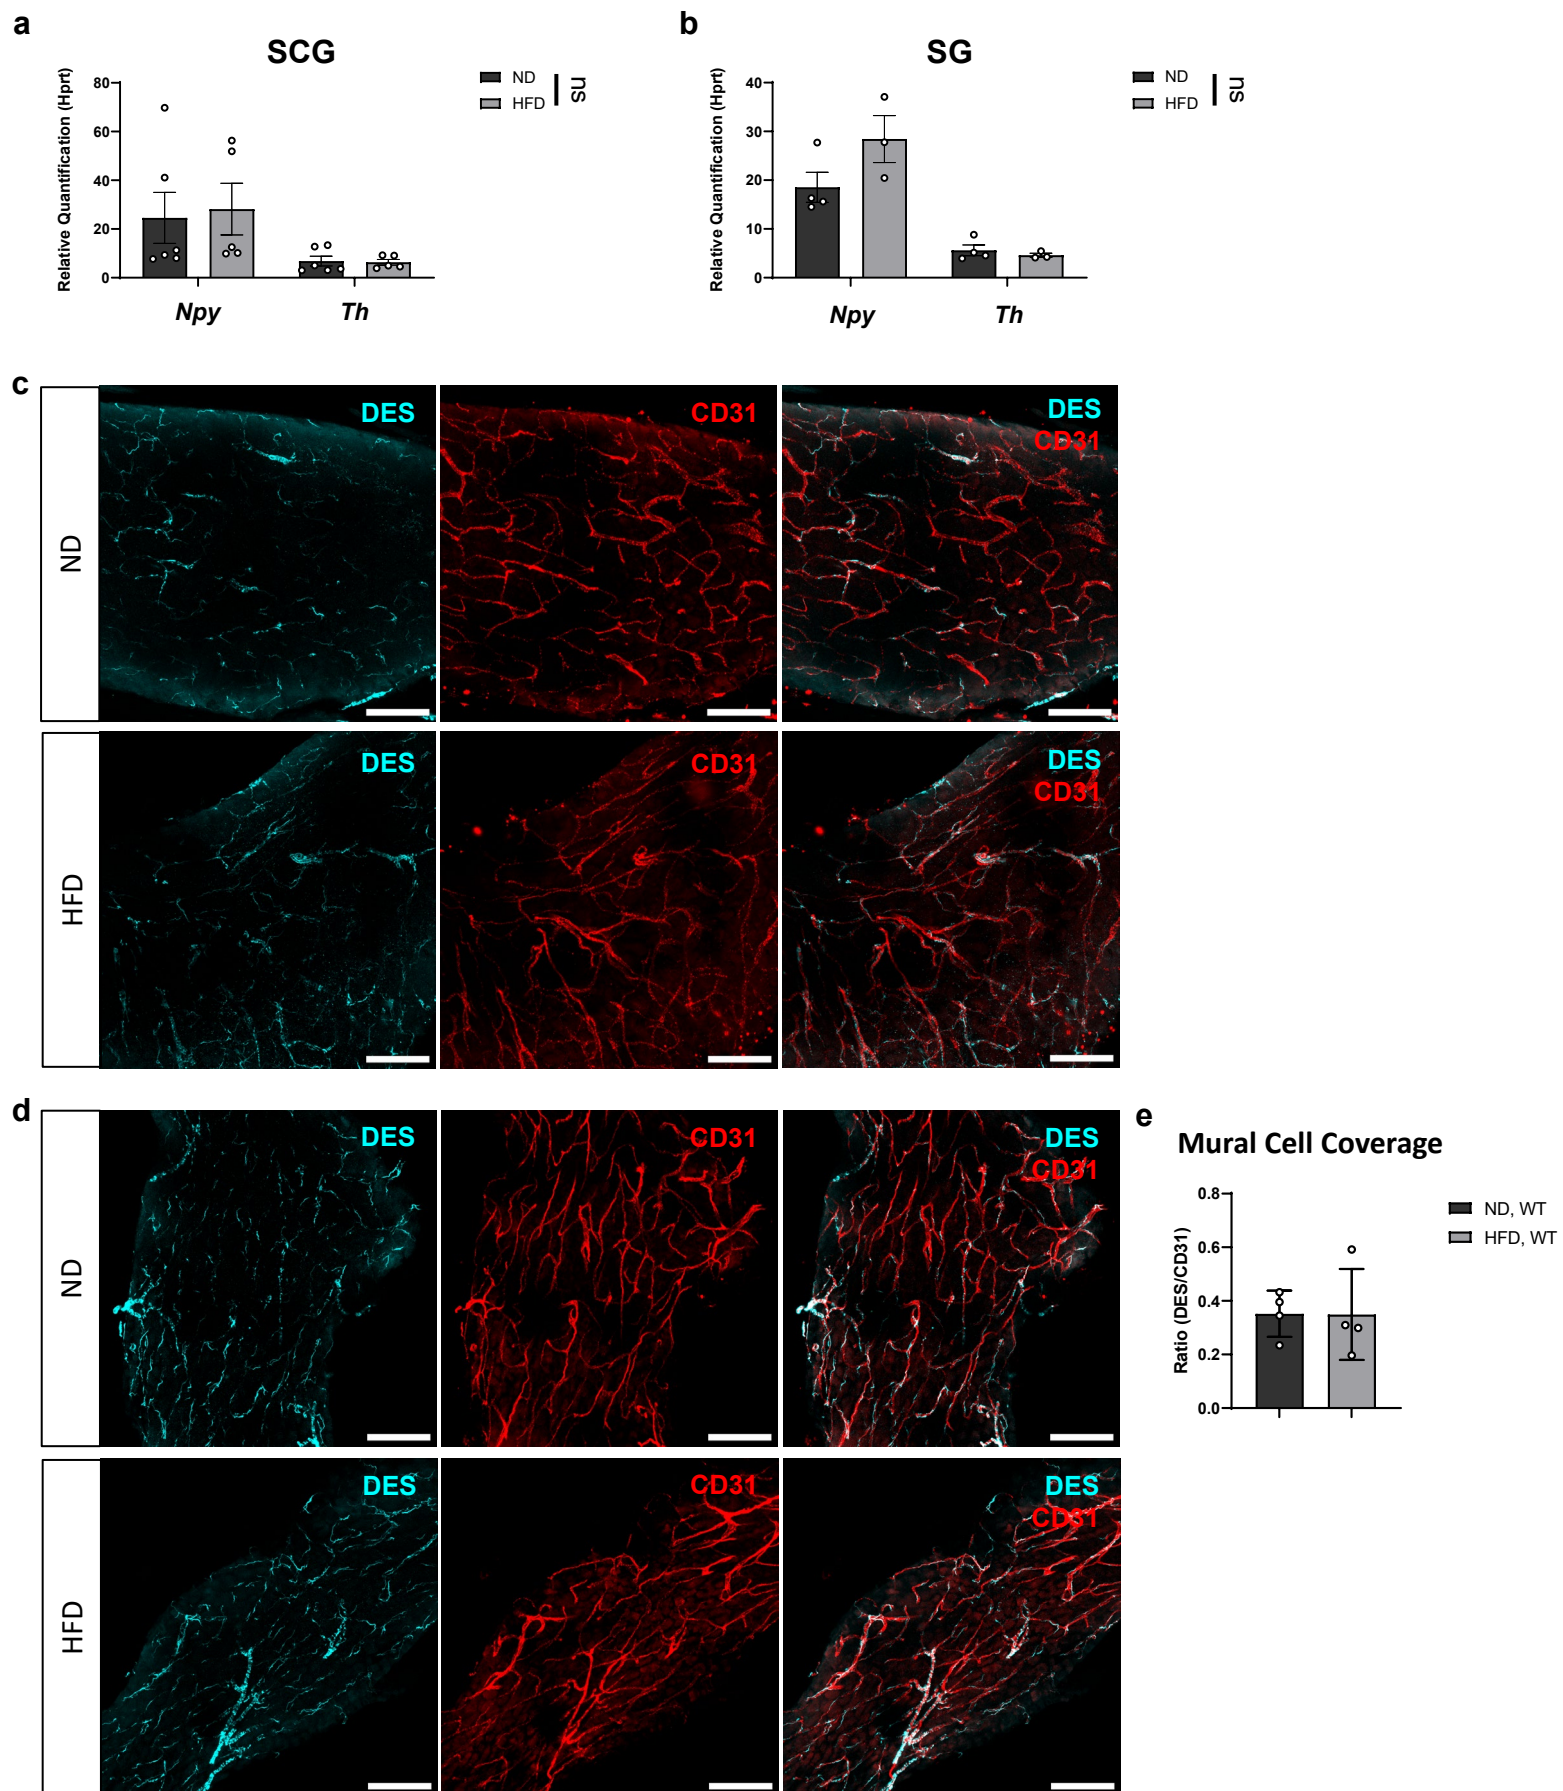

**Supplementary Figure 5. Obesity does not affect *Npy* expression or mural cell coverage in sympathetic ganglia.**

(a-b) The expression of *Npy* and *Th* in the (a) superior cervical ganglia (SCG, n=6&5 mice) and (b) stellate ganglia (SG, n=4&3 mice) of ND- and HFD-treated 17-week-old WT male mice. (c-d) The images of (c) cleared SCG and (d) cleared SG of ND- and HFD-treated 17-week-old WT male mice stained with anti-DES (cyan) and anti-CD31 (red) antibodies. Scale bar=100 $\mu$ m. (e) The quantification of mural cell coverage in SG (n=4 mice). All values are expressed as mean  $\pm$  SEM.

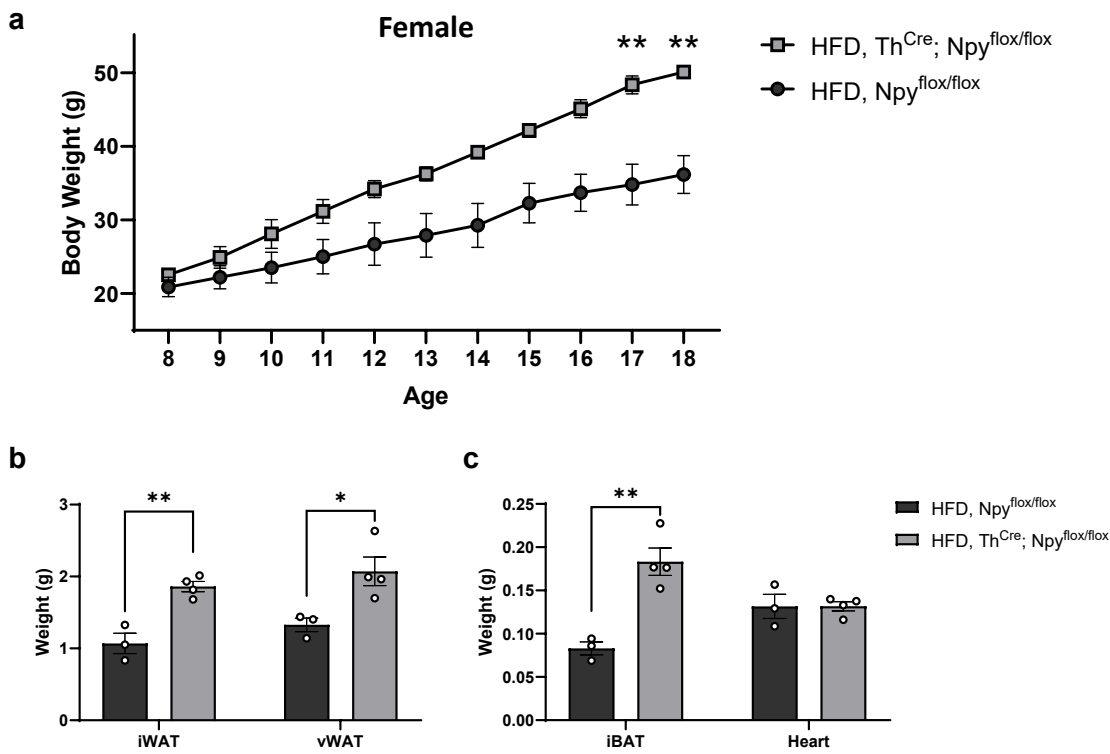

**Supplementary Figure 6. Metabolic phenotype of female Th<sup>Cre</sup>; Npy<sup>flox/flox</sup> mice is similar to that of males.**

(a) The weekly body weights of female Th<sup>Cre</sup>; Npy<sup>flox/flox</sup> mice and WT mice treated with high-fat diet (HFD) (n=4). At Week 17, P=0.0041; at Week 18, P=0.0019. (b-c) The weights of (b) iWAT (P=0.0029) and vWATs (P=0.0299), and (c) iBAT (P=0.0039) and hearts of HFD-treated 18-week-old female Th<sup>Cre</sup>; Npy<sup>flox/flox</sup> mice and Npy<sup>flox/flox</sup> mice (n=3&4). All values are expressed as mean  $\pm$  SEM. Statistical comparisons were made using 2-tailed Student T-tests, \*p<0.05, \*\*p<0.01.

**Supplementary Table 1. The Sequence of Primers for RT-qPCR**

|                |         |                                |
|----------------|---------|--------------------------------|
| <i>Gapdh</i>   | Forward | 5'-AACTTTGGCATTGTGGAAGG-3'     |
|                | Reverse | 5'-ACACATTGGGGGTAGGAACA-3'     |
| <i>Hprt</i>    | Forward | 5'-CAGTCCCAGCGTCGTGATTA-3'     |
|                | Reverse | 5'-TGGCCTCCCATCTCCTTCAT-3'     |
| <i>Plin1</i>   | Forward | 5'-TAGAGTTCCTCCTGCCACCA-3'     |
|                | Reverse | 5'-GTGCTGACCCTCCTCACAAG-3'     |
| <i>Pparg</i>   | Forward | 5'-TCAAGGGTGCCAGTTTCG-3'       |
|                | Reverse | 5'-GGAGGCCAGCATCGTGT-3'        |
| <i>Des</i>     | Forward | 5'-TCCAGTCCTACACCTGCGAGAT-3'   |
|                | Reverse | 5'-CGCAATGTTGTCCTGATAGCCA-3'   |
| <i>Npy</i>     | Forward | 5'-CCCCAGAACAAGGCTTGAAG-3'     |
|                | Reverse | 5'-TTGGAAAAGTCGGGAGAACAA-3'    |
| <i>Npy1r</i>   | Forward | 5'-CTGATGGACCACTGGGTCTT-3'     |
|                | Reverse | 5'-GAAGAAGCCACTGCAAGGAC-3'     |
| <i>Npy2r</i>   | Forward | 5'-ATCATCTTGCTAGGGGTAGTTGG-3'  |
|                | Reverse | 5'-CGGACCCATTTTCCACTCTCC-3'    |
| <i>Npy5r</i>   | Forward | 5'-GTGAACTTTCTCATAGGCAACCT-3'  |
|                | Reverse | 5'-GCATGATATGGCACATGGCTTT-3'   |
| <i>Pdgrfb</i>  | Forward | 5'-AGGACAACCGTACCTTGGGTGACT-3' |
|                | Reverse | 5'-CAGTTCTGACACGTACCGGGTCTC-3' |
| <i>Rgs5</i>    | Forward | 5'-CAAATGGCGGAGAAGGCAA-3'      |
|                | Reverse | 5'-CCAAGTCAAAGCTGCGAGGA-3'     |
| <i>Tgfb1</i>   | Forward | 5'-TGATACGCCTGAGTGGCTGTCT-3'   |
|                | Reverse | 5'-CACAAGAGCAGTGAGCGCTGAA-3'   |
| <i>Cidea</i>   | Forward | 5'-TGCTCTTCTGTATCGCCCAGT-3'    |
|                | Reverse | 5'-GCCGTGTTAAGGAATCTGCTG-3'    |
| <i>Pgc1a</i>   | Forward | 5'-CCCTGCCATTGTTAAGAC-3'       |
|                | Reverse | 5'-TGCTGCTGTTCTGTTTTTC-3'      |
| <i>Ucp1</i>    | Forward | 5'-ACTGCCACACCTCCAGTCATT-3'    |
|                | Reverse | 5'-CTTTGCCTCACTCAGGATTGG-3'    |
| <i>Prdm16</i>  | Forward | 5'-CAGCACGGTGAAGCCATT-3'       |
|                | Reverse | 5'-GCGTGCATCCGCTTGTG-3'        |
| <i>Serca2b</i> | Forward | 5'-ACCTTTGCCGCTCATTTTCCAG-3'   |
|                | Reverse | 5'-AGGCTGCACACACTCTTTACC-3'    |
| <i>Angpt1</i>  | Forward | 5'-TGCAGCAACCAGCGCCGAAA-3'     |
|                | Reverse | 5'-CACGGCAGTTCCCGTCGTGT-3'     |
| <i>Tnf</i>     | Forward | 5'-ATGAGCACAGAAAGCATGA-3'      |
|                | Reverse | 5'-TACAGGCTTGTCACTCGAA-3'      |
| <i>Il6</i>     | Forward | 5'-ACGGCCTTCCCTACTTCACA-3'     |
|                | Reverse | 5'-CATTCCACGATTTCCAGA-3'       |



## References

- 1 Henriques, F. *et al.* Single-cell RNA profiling reveals adipocyte to macrophage signaling sufficient to enhance thermogenesis. *Cell reports* **32**, 107998 (2020).
- 2 Shamsi, F. *et al.* Vascular smooth muscle-derived Trpv1+ progenitors are a source of cold-induced thermogenic adipocytes. *Nature metabolism* **3**, 485-495 (2021).
